# Supplementary material for: A robust and repairable superhydrophobic Co5Zn21 alloy surface on a zinc substrate
Source: Royal Society of Chemistry journal article supplement (doi:10.1039/c7nj04201a), 2018-01-01
Supplement: c7nj04201a1.pdf [file c7nj04201a1.pdf]

## Supplementary Information

### Robust superhydrophobic $\text{Co}_5\text{Zn}_{21}$ alloy surface with repairable on zinc substrate

E-mail: [shixianglu@bit.edu.cn](mailto:shixianglu@bit.edu.cn)

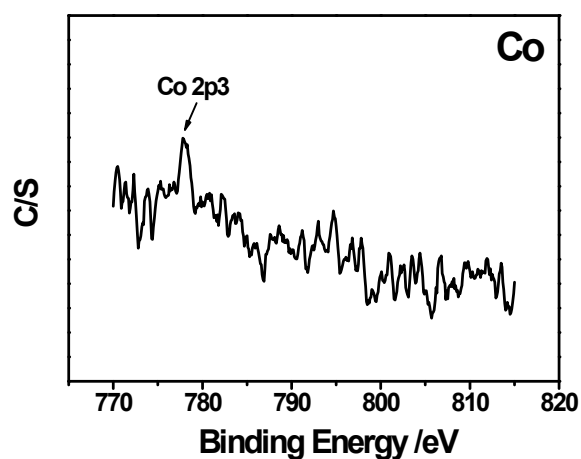

ESI.S2† XPS spectra of SHS: Co 2p region
